# Supplementary material
Source: PubMed Central journal article supplement (PMC2844263)
Supplement: NIHMS29155-supplement-Sup_Fig_2.pdf [file NIHMS29155-supplement-Sup_Fig_2.pdf]

|               |           |         |               |                                                 |
|---------------|-----------|---------|---------------|-------------------------------------------------|
|               | *         | *       |               | *                                               |
| Human IgK V-J | SPSSLSASV | GDRVTIT | CRASQGISNYLAW | FQ.....QKPGKAPELLIYAASGLQSG...VPSKFSGSGSGTDFTLT |
| Pig IgK V-J   | SPASLAASL | GDTVSIT | CRASQSISSSLGW | YQ.....QQPGKAPKLLIYAASGLQSG...VPSRFKSGSGTDFTLT  |
| Mouse IgK V-J | SPSPMYASL | GERVTIT | CKASQDINSHLSW | FQ.....QKPGKSPKTLIHRADRLVDG...VPSRFSGSGSGQDYSLT |
|               |           |         |               |                                                 |
| HCMV UL141    | SPA       | PVLVAE  | GEQVTIP       | CTVM.....THSWPMVSI                              |
| CCMV UL141    | SPA       | PMLVAE  | GERVTVP       | CTVM.....IHQWPLAVI                              |
| RhCMV UL141   | SPA       | PLIMPIG | SQVTVP        | CAFL.....PHSWPMVSI                              |
| HCMV UL14     | PGS       | PQLLPY  | GDRLEVAC      | IFP.....AHDWPEVSI                               |
| CCMV UL14     | LSS       | PKMLPY  | GDRLDVSC      | IFP.....SHAWPEVSI                               |

### Supplementary Figure 2

**Ig-like  $\beta$  sandwich domain encoded by HCMV UL141 (residues 15-114 in the mature protein), its orthologues in chimpanzee and rhesus cytomegalovirus (CCMV and RhCMV UL141), and the related UL14 gene in HCMV and CCMV.** The domain was initially identified using the protein fold recognition program 3D-PSSM (<http://www.sbg.bio.ic.ac.uk/~3dpssm/>), and the alignment was derived from sequences in GenBank. Residues that are conserved in all the viral sequences and, in some instances, in cellular proteins containing the cognate domain, are in red. The central part of the alignment is predicated on the conserved W residue (asterisked) that is packed against the disulphide bond (C residues asterisked) in most Ig domains.
