# Supplementary material
Source: PubMed Central journal article supplement (PMC2844263)

### Supplementary Figure 3

**Expression of a Secreted form of gpUL141** A soluble form of UL141 (designated P550) was expressed in which the putative C-terminal intracellular and membrane spanning domains were replaced with a *Strep*-tag. The identity of affinity purified product was verified in western blot experiments with specific anti-tag reagents and by N-terminal protein sequencing. The solUL141 sequence in the alignment illustrates the location of the signal peptidase cleavage site determined by N-terminal protein sequencing together with the modifications made to the C-terminus.

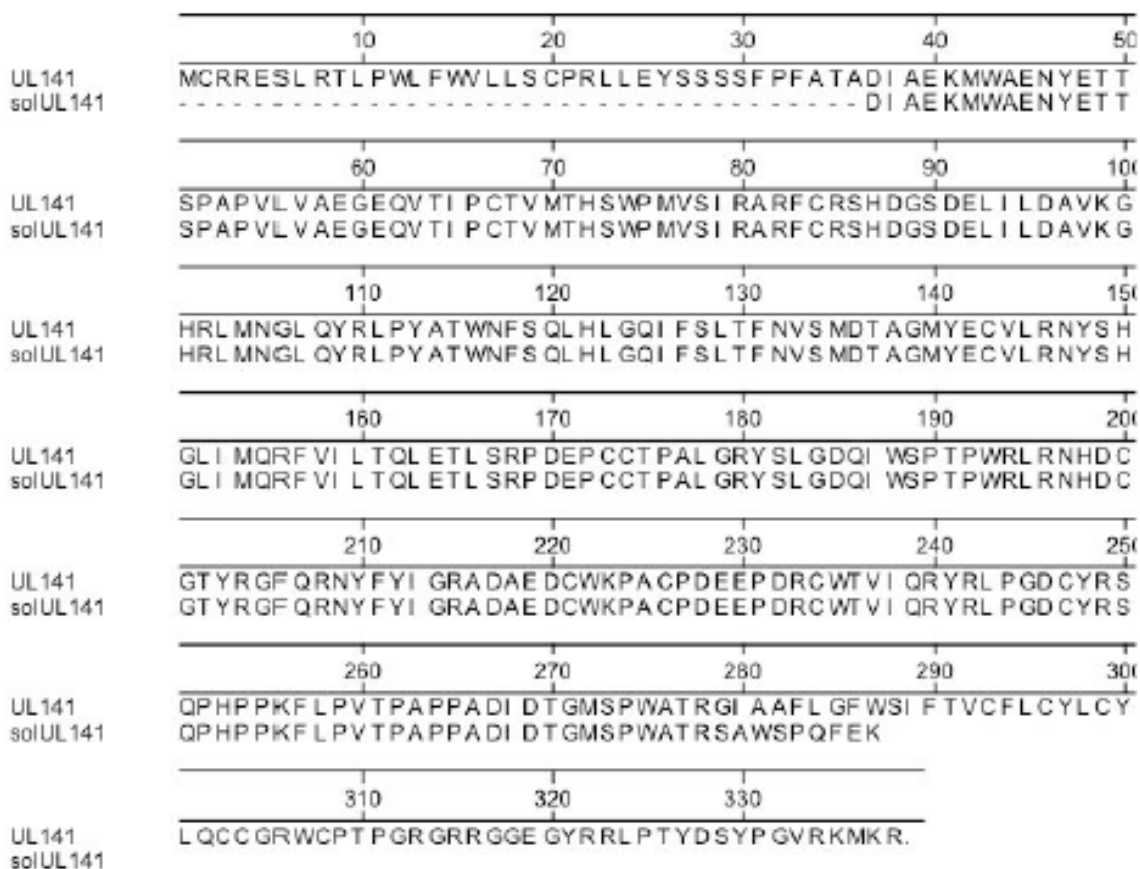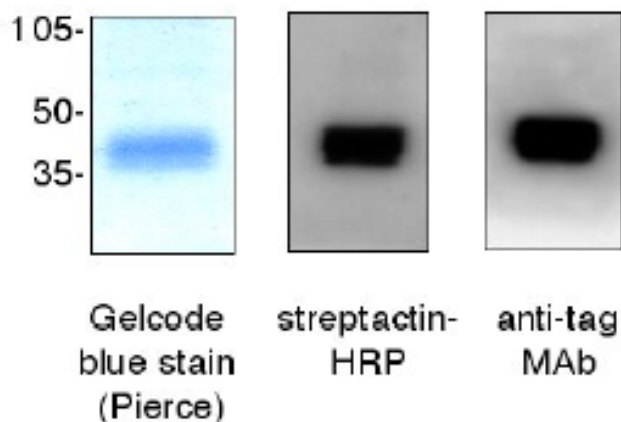

Supplement: NIHMS29155-supplement-Sup_Fig_3.pdf [file NIHMS29155-supplement-Sup_Fig_3.pdf]
