# Supplementary material
Source: PubMed Central journal article supplement (PMC2844263)

### Supplementary Figure 4

**GpUL141 is expressed with early-late phase kinetics.** HFFFs were infected with HCMV strains Toledo or AD169 for the times indicated. The immunoblot experiment detects expression of gpUL141 in the absence (M) or presence (+P) of the inhibitor of the HCMV DNA polymerase phosphonoformic acid (300 g/ml). Expression in the presence of an inhibitor of HCMV DNA replication is evidence of early phase expression

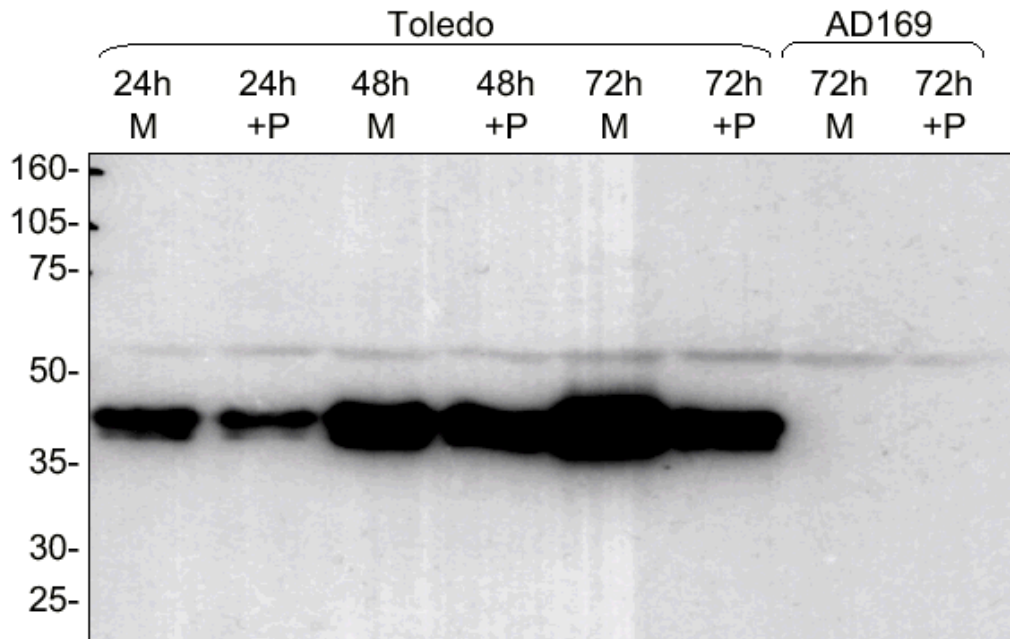

Supplement: NIHMS29155-supplement-Sup_Fig_4.pdf [file NIHMS29155-supplement-Sup_Fig_4.pdf]
