# Supplementary material
Source: PubMed Central journal article supplement (PMC2844263)

### Supplementary Figure 6

**NK killing of autologous strain TB40E-Bart-infected fibroblasts is inhibited by treatment with the anti-CD155 mAb D171.** D7SF were infected with either strain TB40E-Lisa (circles) or strain TB40E-Bart (squares) at a MOI of 10 for 72 hrs before standard NK cytotoxicity assay using IFN $\alpha$ -activated, T-cell depleted D7 PBMC as effectors. Prior to assay, targets were treated with either control mouse IgG (filled) or CD155 mAb D171 (open) at a final concentration of 10  $\mu$ g/ml for 10 mins at 37°C. CD155 mAb treatment partially inhibited killing of strain TB40E-Bart-infected targets.

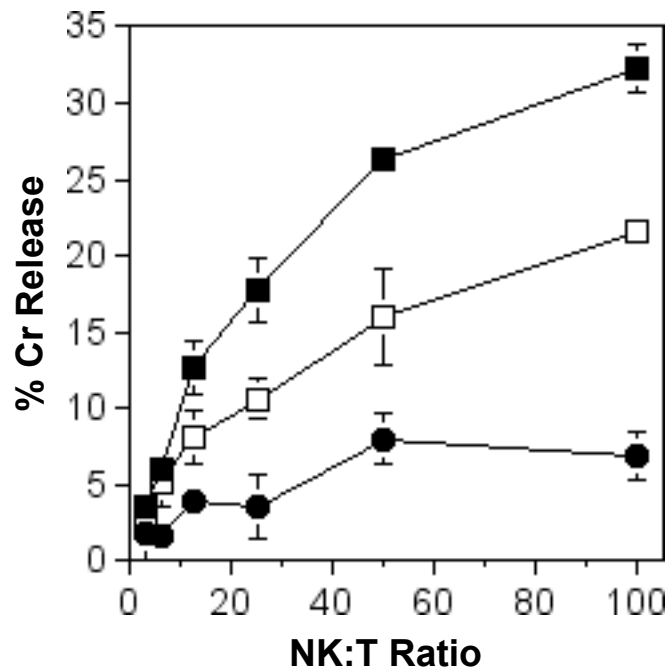

Supplement: NIHMS29155-supplement-Sup_Fig_6.pdf [file NIHMS29155-supplement-Sup_Fig_6.pdf]
