# Supplementary material
Source: PubMed Central journal article supplement (PMC2844263)

### Supplementary Figure 7

**UL141, but not UL144 or UL145, inhibited expression of CD155 on stably transfected HEK-293 cell lines.** HEK-293 cells were stably transfected with UL141-, UL144- and UL145-GFP fusion proteins. These cell lines were co-stained with the CD155 mAb D171, which was then visualized using an anti-mouse IgG secondary Ab conjugated with Alexa Fluor 647 (AF647). Cell lines are as labeled and were gated for GFP protein expression before analysis for CD155 expression. The dotted lines on each histogram represent the mouse IgG negative controls.

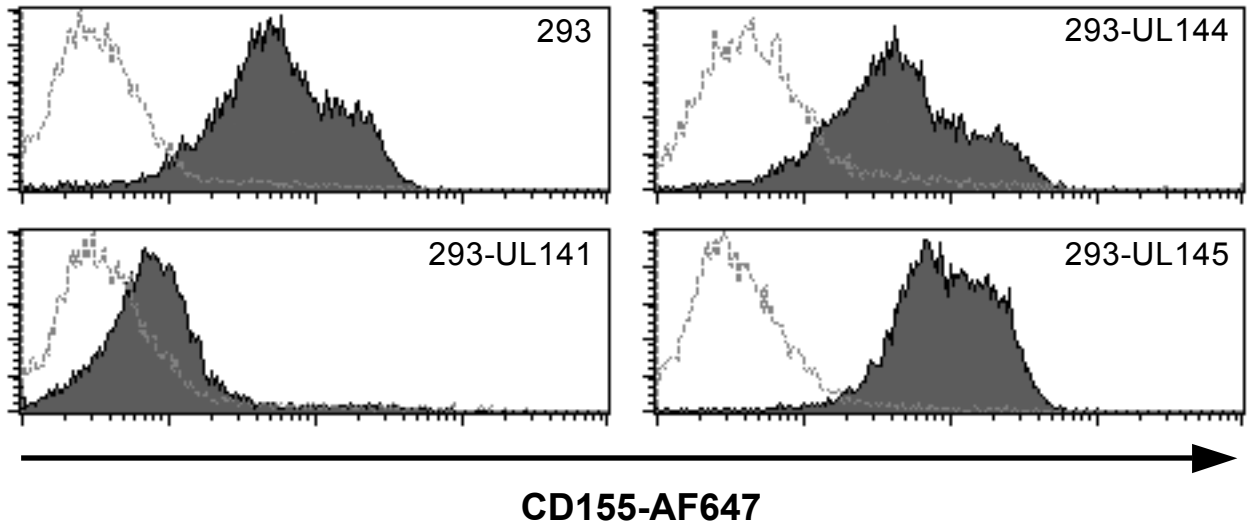

Supplement: NIHMS29155-supplement-Sup_Fig_7.pdf [file NIHMS29155-supplement-Sup_Fig_7.pdf]
