# Supplementary material
Source: PubMed Central journal article supplement (PMC2844263)

### Supplementary Figure 8

**Pre-treatment with soluble UL141 blocks binding of the CD155 mAb D171.** The indicated cell lines were either mock-treated or treated with 50 µg/ml soluble UL141 conjugated with a Strep-TAG (sUL141) for 3 hrs at 4°C. Cell lines were then stained with CD155 mAb D171 and visualized using anti-mouse IgG conjugated with Alexa Fluor 647 (AF647). Soluble UL141 binding was visualized using streptactin-PE. Numbers on each dot plot represent the median fluorescence channels for the PE and AF647 signals. (A) Negative control staining for each of the cell lines, consisting of mouse IgG plus secondary and streptactin-PE by itself. (B) CD155 staining in the absence of sUL141 treatment showing amounts of CD155 on JW-LCLs, HFFFs and HEK-293s. (C) Effect of treatment with sUL141 on CD155 mAb binding. Increasing sUL141 binding was associated with a relative decrease in signal from the CD155 mAb.

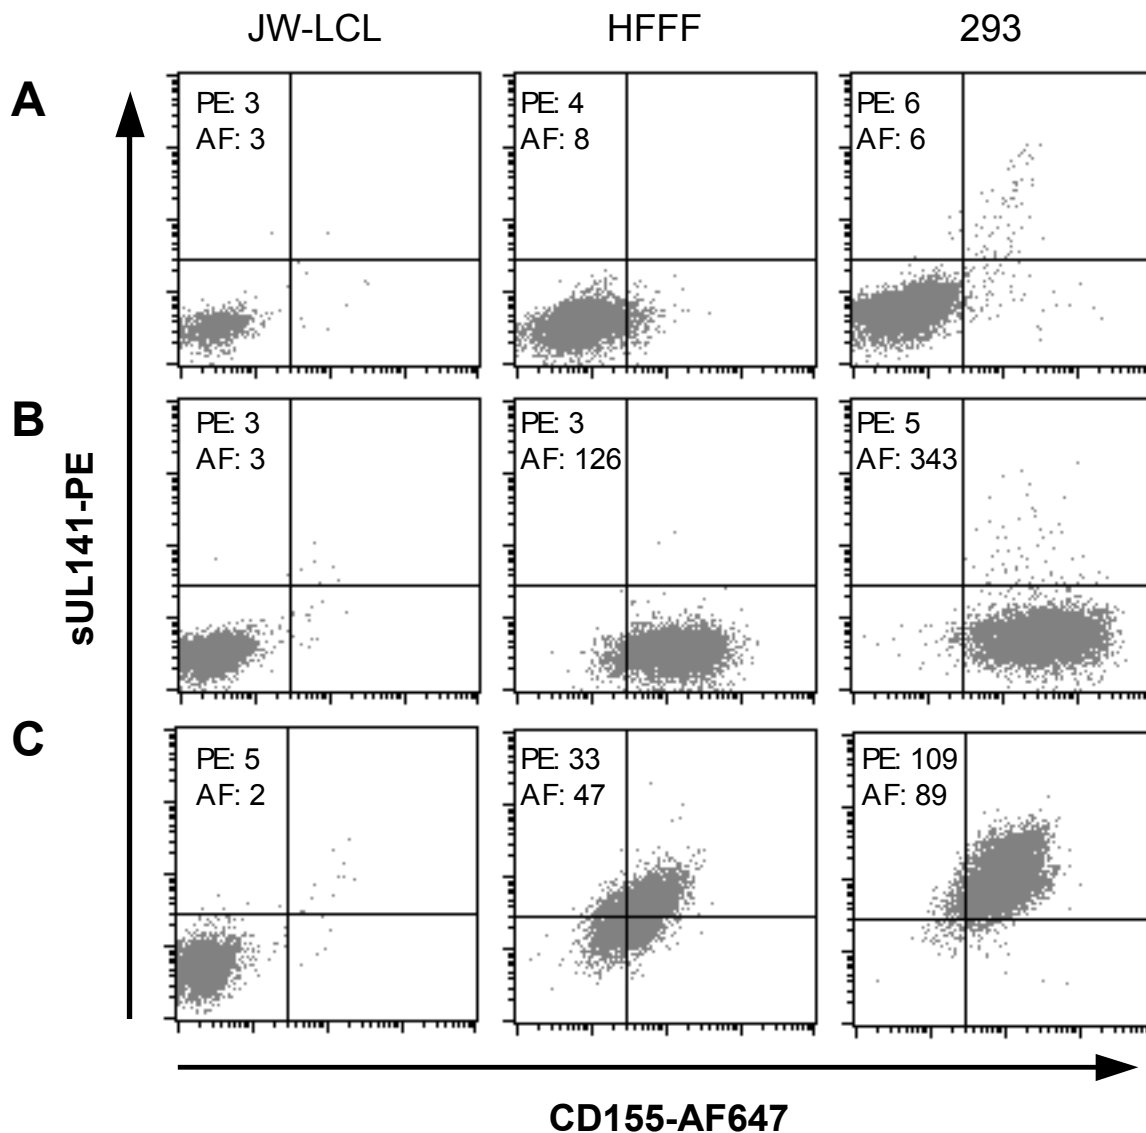

Supplement: NIHMS29155-supplement-Sup_Fig_8.pdf [file NIHMS29155-supplement-Sup_Fig_8.pdf]
