# Supplementary material
Source: PubMed Central journal article supplement (PMC2844263)

## Supplementary Figure 9

**Adhesion between NK cells and targets expression UL141.** Targets (HFFF) were labelled with green tracer (Molecular Probes VYBRANT CFDA SE Cell tracer Kit) and NK cells (NKL) with far red tracer (Molecular Probes Cell Trace Far Red DDAO-SE). Targets and NKLs were incubated together for 10 minutes (ratio 1:2) in serum free medium at 37°C, then chilled on ice and fixed with paraformaldehyde prior to analysis. The degree of complex formation between the two cell types constitutes a relative measurement of cell-to-cell adhesion over the duration of the assay. Targets infected with RAdUL141 formed marginally fewer complexes with NK cells than targets infected with control adenovirus. No difference in complex formation was observed with targets infected with HCMV TB40E-Lisa or TB40E-Bart.

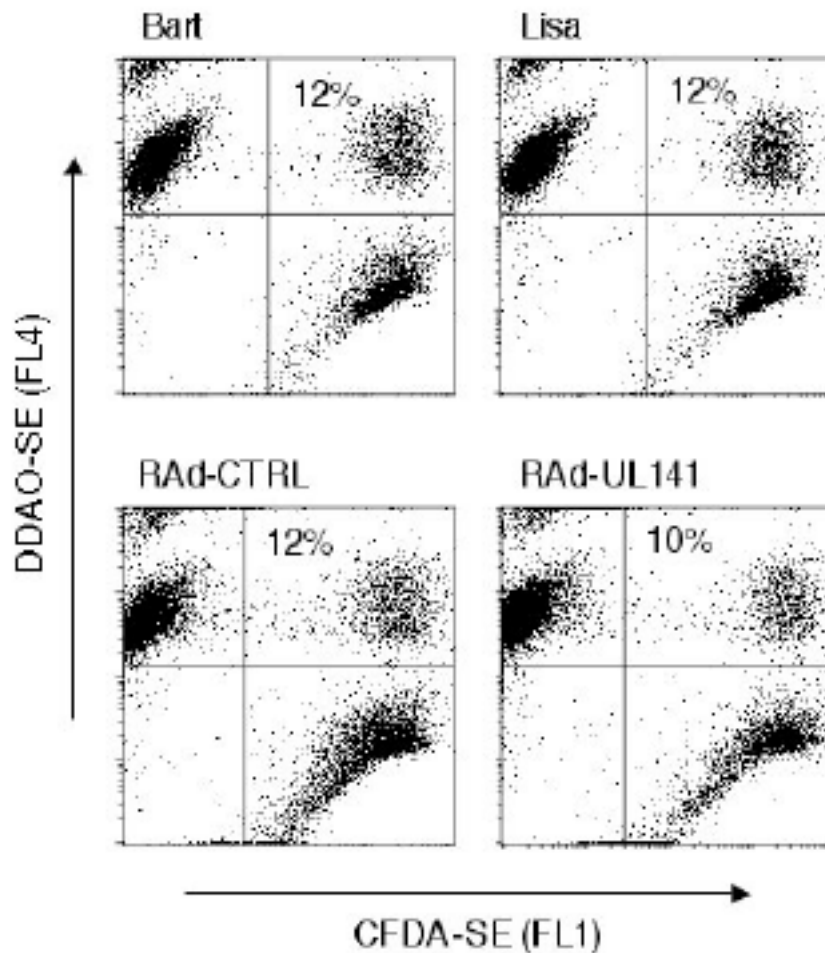

Supplement: NIHMS29155-supplement-Sup_Fig_9.pdf [file NIHMS29155-supplement-Sup_Fig_9.pdf]
